# Supplementary material
Source: MDPI journal article supplement (https://www.mdpi.com/2076-3417/12/3/1417)
Supplement: s1 [file s1]

Supplementary

# Assessment of Pesticide Content in Apples and Selected Citrus Fruits Subjected to Simple Culinary Processing

Grażyna Kowalska <sup>1,\*</sup>, Urszula Pankiewicz <sup>2</sup> and Radosław Kowalski <sup>2</sup>

Both transitions were used for quantification and confirmation purposes (Table S1, Table S2).

**Table S1.** List of pesticides determined in the positive ionization mode.

| No. | ID                    | RT<br>(min) | Q1    | Q3    | DP | EP | CE | CXP |
|-----|-----------------------|-------------|-------|-------|----|----|----|-----|
| 1.  | 3 hydroxycarbofuran 1 | 7.9         | 238.1 | 220.1 | 50 | 10 | 9  | 9   |
| 2.  | 3 hydroxycarbofuran 2 | 7.9         | 238.1 | 181.1 | 50 | 10 | 11 | 11  |
| 3.  | 3,5-Dichloroaniline 1 | 12.2        | 162   | 127   | 56 | 10 | 29 | 22  |
| 4.  | 3,5-Dichloroaniline 2 | 12.2        | 164   | 129   | 51 | 10 | 29 | 6   |
| 5.  | Abamectin 1           | 13.9        | 890.5 | 567.4 | 81 | 10 | 29 | 10  |
| 6.  | Abamectin 2           | 13.9        | 890.5 | 305.3 | 81 | 10 | 37 | 8   |
| 7.  | Acephate 1            | 3.7         | 184   | 143   | 51 | 10 | 13 | 10  |
| 8.  | Acephate 2            | 3.7         | 184   | 125   | 51 | 10 | 25 | 5   |
| 9.  | Acetamiprid 1         | 7.4         | 223   | 126   | 71 | 10 | 31 | 6   |
| 10. | Acetamiprid 2         | 7.4         | 223   | 99    | 71 | 10 | 51 | 6   |
| 11. | Acrinathrin 1         | 15.2        | 559.1 | 208.1 | 66 | 10 | 23 | 10  |
| 12. | Acrinathrin 2         | 15.2        | 559.1 | 181.1 | 66 | 10 | 43 | 8   |
| 13. | Alachlor 1            | 12.7        | 270.1 | 238.1 | 31 | 10 | 15 | 8   |
| 14. | Alachlor 2            | 12.7        | 270.1 | 162.2 | 31 | 10 | 25 | 8   |
| 15. | Aldicarb 1            | 8.9         | 208.2 | 116   | 50 | 10 | 20 | 10  |
| 16. | Aldicarb 2            | 8.9         | 208.2 | 89    | 50 | 10 | 20 | 10  |
| 17. | Aldicarb Sulfoxide 1  | 4.4         | 207.3 | 132   | 56 | 10 | 11 | 10  |
| 18. | Aldicarb Sulfoxide 2  | 4.4         | 207.3 | 89    | 56 | 10 | 19 | 6   |
| 19. | Aldicarb Sulphone 1   | 4.8         | 223.1 | 86.2  | 66 | 10 | 25 | 4   |
| 20. | Aldicarb Sulphone 2   | 4.8         | 223.1 | 148   | 66 | 10 | 13 | 14  |
| 21. | Ametryn 1             | 11.7        | 228   | 186   | 50 | 10 | 35 | 10  |
| 22. | Ametryn 2             | 11.7        | 228   | 116   | 50 | 10 | 35 | 10  |
| 23. | Amitraz 1             | 17.4        | 294.2 | 163.1 | 50 | 10 | 21 | 9   |
| 24. | Amitraz 2             | 17.4        | 294.2 | 122.1 | 50 | 10 | 41 | 10  |
| 25. | Atrazine 1            | 11.2        | 216.1 | 104   | 76 | 10 | 41 | 10  |
| 26. | Atrazine 2            | 11.2        | 216.1 | 174   | 76 | 10 | 25 | 12  |
| 27. | Azinophos-Et 1        | 12.4        | 346.3 | 160   | 50 | 10 | 15 | 10  |
| 28. | Azinophos-Et 2        | 12.4        | 346.3 | 132   | 50 | 10 | 20 | 10  |
| 29. | Azinphos-Me 1         | 11.3        | 318   | 160   | 50 | 10 | 15 | 10  |
| 30. | Azinphos-Me 2         | 11.3        | 318   | 132   | 50 | 10 | 20 | 10  |
| 31. | Azoxystrobin 1        | 11.3        | 404   | 344.2 | 50 | 10 | 35 | 10  |
| 32. | Azoxystrobin 2        | 11.3        | 404   | 372   | 50 | 10 | 20 | 10  |
| 33. | Benfuracarb 1         | 14.2        | 411.4 | 252   | 36 | 10 | 19 | 12  |
| 34. | Benfuracarb 2         | 14.2        | 411.4 | 195   | 36 | 10 | 31 | 12  |

|     |                       |      |         |         |    |    |    |    |
|-----|-----------------------|------|---------|---------|----|----|----|----|
| 35. | Benzoylprop ethyl 1   | 13.5 | 368.098 | 105.088 | 61 | 10 | 19 | 9  |
| 36. | Benzoylprop ethyl 2   | 13.5 | 368.097 | 77.159  | 61 | 10 | 75 | 12 |
| 37. | Bifenazate 1          | 12.6 | 301.2   | 170     | 60 | 10 | 20 | 9  |
| 38. | Bifenazate 2          | 12.6 | 301.2   | 152     | 60 | 10 | 40 | 7  |
| 39. | Bromacil 1            | 9.9  | 261.2   | 188     | 41 | 10 | 41 | 10 |
| 40. | Bromacil 2            | 9.9  | 261.2   | 205     | 41 | 10 | 19 | 12 |
| 41. | Bromuconazole 1       | 12.5 | 378     | 159     | 50 | 10 | 35 | 10 |
| 42. | Bromuconazole 2       | 12.5 | 378     | 70      | 50 | 10 | 35 | 10 |
| 43. | Buprofezine 1         | 14.7 | 306.2   | 116     | 50 | 10 | 20 | 10 |
| 44. | Buprofezine 2         | 14.7 | 306.2   | 201     | 50 | 10 | 35 | 10 |
| 45. | Butoxycarboxin 1      | 5.2  | 223.1   | 106.1   | 40 | 10 | 9  | 9  |
| 46. | Butoxycarboxin 2      | 5.2  | 223.1   | 86.2    | 40 | 10 | 10 | 9  |
| 47. | Carbaryl 1            | 10.4 | 202.1   | 127.1   | 50 | 10 | 35 | 10 |
| 48. | Carbaryl 2            | 10.4 | 202.1   | 145.1   | 50 | 10 | 20 | 10 |
| 49. | Carbendazim 1         | 8.4  | 192.1   | 132.1   | 50 | 10 | 50 | 10 |
| 50. | Carbendazim 2         | 8.4  | 192.1   | 160.1   | 50 | 10 | 20 | 10 |
| 51. | Carbetamide 1         | 9.3  | 237.1   | 118.1   | 21 | 10 | 19 | 8  |
| 52. | Carbetamide 2         | 9.3  | 237.1   | 192     | 21 | 10 | 13 | 8  |
| 53. | Carbofuran 1          | 9.8  | 222.1   | 165     | 61 | 10 | 20 | 10 |
| 54. | Carbofuran 2          | 9.8  | 222.1   | 123     | 61 | 10 | 31 | 10 |
| 55. | Carbosulfan 1         | 18.2 | 381.2   | 118     | 50 | 10 | 35 | 10 |
| 56. | Carbosulfan 2         | 18.2 | 381.2   | 160     | 50 | 10 | 20 | 10 |
| 57. | Carboxin 1            | 10.2 | 236     | 142.9   | 50 | 10 | 20 | 10 |
| 58. | Carboxin 2            | 10.2 | 236     | 93.1    | 50 | 10 | 35 | 10 |
| 59. | Chlorantraniliprole 1 | 11.6 | 482.1   | 450.9   | 66 | 10 | 21 | 9  |
| 60. | Chlorantraniliprole 2 | 11.6 | 482.1   | 283.8   | 66 | 10 | 19 | 11 |
| 61. | Chloridazon 1         | 7.7  | 222     | 104.2   | 56 | 10 | 31 | 8  |
| 62. | Chloridazon 2         | 7.7  | 222     | 92.2    | 56 | 10 | 35 | 8  |
| 63. | Chlorotoluron 1       | 10.7 | 213.1   | 72      | 66 | 10 | 33 | 8  |
| 64. | Chlorotoluron 2       | 10.7 | 215.1   | 72      | 66 | 10 | 33 | 8  |
| 65. | Chlorpyrifos 1        | 15.4 | 349.9   | 115.1   | 66 | 10 | 33 | 8  |
| 66. | Chlorpyrifos 2        | 15.4 | 349.9   | 197.9   | 66 | 10 | 25 | 14 |
| 67. | Chlorsulfuron 1       | 6.6  | 358     | 141     | 51 | 10 | 23 | 8  |
| 68. | Chlorsulfuron 2       | 6.6  | 358     | 167     | 51 | 10 | 25 | 8  |
| 69. | Clofentezine 1        | 13.4 | 303     | 102.1   | 51 | 10 | 53 | 8  |
| 70. | Clofentezine 2        | 13.4 | 303     | 138     | 51 | 10 | 21 | 8  |
| 71. | Clomazone 1           | 11.5 | 240.1   | 125     | 56 | 10 | 27 | 8  |
| 72. | Clomazone 2           | 11.5 | 240.1   | 89.1    | 56 | 10 | 65 | 8  |
| 73. | Clothianidin 1        | 6.9  | 250     | 132     | 50 | 10 | 30 | 8  |
| 74. | Clothianidin 2        | 6.9  | 250     | 169     | 50 | 10 | 30 | 8  |
| 75. | Coumaphos 1           | 13   | 363     | 227     | 66 | 10 | 35 | 8  |
| 76. | Coumaphos 2           | 13   | 363     | 307     | 66 | 10 | 23 | 8  |
| 77. | Cyanazine 1           | 9.3  | 241.1   | 214.1   | 41 | 10 | 23 | 8  |
| 78. | Cyanazine 2           | 9.3  | 241.1   | 104.1   | 41 | 10 | 41 | 8  |
| 79. | Cyanofenophos 1       | 13.1 | 304     | 276     | 66 | 10 | 17 | 6  |
| 80. | Cyanofenophos 2       | 13.1 | 304     | 157     | 66 | 10 | 27 | 6  |
| 81. | Cycloate 1            | 14.7 | 216     | 154     | 41 | 10 | 17 | 6  |
| 82. | Cycloate 2            | 14.7 | 216     | 83      | 56 | 10 | 23 | 4  |
| 83. | Cymoxanil 1           | 8.4  | 199.2   | 128     | 46 | 10 | 13 | 8  |

|      |                           |      |         |        |    |    |    |    |
|------|---------------------------|------|---------|--------|----|----|----|----|
| 84.  | Cymoxanil 2               | 8.4  | 199.2   | 111    | 46 | 10 | 27 | 8  |
| 85.  | Cyphenothrin 1            | 17.0 | 393     | 151    | 71 | 10 | 21 | 12 |
| 86.  | Cyphenothrin 2            | 17.0 | 393     | 123    | 71 | 10 | 33 | 8  |
| 87.  | Cyprofuram 1              | 10.7 | 280.1   | 166.2  | 23 | 10 | 22 | 8  |
| 88.  | Cyprofuram 2              | 10.7 | 280.1   | 184.1  | 23 | 10 | 27 | 9  |
| 89.  | DEF 1                     | 17.3 | 315.2   | 169.2  | 28 | 10 | 23 | 8  |
| 90.  | DEF 2                     | 17.3 | 315.2   | 259.3  | 28 | 10 | 20 | 13 |
| 91.  | Demeton-S-methyl 1        | 10   | 248     | 89.1   | 6  | 10 | 17 | 10 |
| 92.  | Demeton-S-methyl 2        | 10   | 248     | 61     | 6  | 10 | 47 | 10 |
| 93.  | Demeton-S-methylsulphon 1 | 5.6  | 263     | 169.1  | 71 | 10 | 23 | 10 |
| 94.  | Demeton-S-methylsulphon 2 | 5.6  | 263     | 108.9  | 71 | 10 | 41 | 6  |
| 95.  | Desethyl atrazin 1        | 8.3  | 188.1   | 104    | 56 | 10 | 33 | 8  |
| 96.  | Desethyl atrazin 2        | 8.3  | 188.1   | 146    | 56 | 10 | 25 | 8  |
| 97.  | Desisopropyl atrazin 1    | 6.7  | 174.07  | 103.85 | 56 | 10 | 31 | 8  |
| 98.  | Desisopropyl atrazin 2    | 6.7  | 174.07  | 95.95  | 56 | 10 | 27 | 8  |
| 99.  | Desmedipham 1             | 11.1 | 301.2   | 136    | 66 | 10 | 33 | 8  |
| 100. | Desmedipham 2             | 11.1 | 301.2   | 182.1  | 66 | 10 | 13 | 12 |
| 101. | Desmetryn 1               | 11.5 | 214.1   | 82.1   | 65 | 10 | 44 | 6  |
| 102. | Desmetryn 2               | 11.5 | 214.1   | 116.1  | 65 | 10 | 43 | 6  |
| 103. | Diafenthiuron 1           | 16   | 385.3   | 329.3  | 60 | 10 | 29 | 17 |
| 104. | Diafenthiuron 2           | 16   | 385.3   | 278.3  | 60 | 10 | 45 | 14 |
| 105. | Dialifos 1                | 14.5 | 394     | 208.1  | 46 | 10 | 23 | 9  |
| 106. | Dialifos 2                | 14.5 | 394     | 186.9  | 46 | 10 | 17 | 9  |
| 107. | Diazinon 1                | 13.7 | 305.1   | 169.1  | 60 | 10 | 29 | 9  |
| 108. | Diazinon 2                | 13.7 | 305.1   | 96.6   | 60 | 10 | 41 | 10 |
| 109. | Dichlofluanid 1           | 13.1 | 333     | 123    | 56 | 10 | 24 | 9  |
| 110. | Dichlofluanid 2           | 13.1 | 333     | 224    | 56 | 10 | 17 | 10 |
| 111. | Diclorovos 1              | 9.7  | 221     | 109    | 76 | 10 | 27 | 6  |
| 112. | Diclorovos 2              | 9.7  | 221     | 127    | 76 | 10 | 25 | 10 |
| 113. | Dicrotophos 1             | 6.4  | 238.1   | 127.1  | 16 | 10 | 23 | 8  |
| 114. | Dicrotophos 2             | 6.4  | 238.1   | 112.1  | 16 | 10 | 17 | 8  |
| 115. | Dimefuron 1               | 11.2 | 339.1   | 167    | 61 | 10 | 29 | 8  |
| 116. | Dimefuron 2               | 11.2 | 339.1   | 256    | 61 | 10 | 21 | 8  |
| 117. | Dimethachlor 1            | 11.4 | 256.1   | 224.2  | 26 | 10 | 19 | 10 |
| 118. | Dimethachlor 2            | 11.4 | 256.1   | 148.1  | 26 | 10 | 33 | 10 |
| 119. | Dimethenamide 1           | 12   | 276.1   | 244.1  | 11 | 10 | 19 | 8  |
| 120. | Dimethenamide 2           | 12   | 276.1   | 168.1  | 11 | 10 | 33 | 8  |
| 121. | Dimethoate 1              | 7.6  | 230     | 171    | 50 | 10 | 20 | 10 |
| 122. | Dimethoate 2              | 7.6  | 230     | 199    | 50 | 10 | 20 | 10 |
| 123. | Dimethomorph 1            | 11.8 | 388     | 301    | 50 | 10 | 35 | 10 |
| 124. | Dimethomorph 2            | 11.8 | 388     | 165    | 50 | 10 | 50 | 10 |
| 125. | Diniconazole 1            | 14.0 | 326.1   | 70.2   | 60 | 10 | 25 | 9  |
| 126. | Diniconazole 2            | 14.0 | 326.1   | 159    | 60 | 10 | 34 | 10 |
| 127. | Diphenamide 1             | 11.6 | 240.1   | 134.1  | 50 | 10 | 20 | 9  |
| 128. | Diphenamide 2             | 11.6 | 240.1   | 167.1  | 50 | 10 | 22 | 10 |
| 129. | Diphenylamine 1           | 12.4 | 170.144 | 93.1   | 66 | 10 | 37 | 6  |
| 130. | Diphenylamine 2           | 12.4 | 170.144 | 152    | 66 | 10 | 35 | 10 |
| 131. | Disulfoton 1              | 14.2 | 275     | 89.2   | 6  | 10 | 17 | 10 |
| 132. | Disulfoton 2              | 14.2 | 275     | 61.1   | 6  | 10 | 43 | 4  |

|      |                                         |      |         |         |    |    |    |    |
|------|-----------------------------------------|------|---------|---------|----|----|----|----|
| 133. | Ditalimfos 1                            | 12.9 | 300.1   | 148     | 60 | 10 | 20 | 9  |
| 134. | Ditalimfos 2                            | 12.9 | 300.1   | 130.1   | 60 | 10 | 34 | 10 |
| 135. | Diuron 1                                | 11.1 | 233.2   | 160     | 71 | 10 | 35 | 10 |
| 136. | Diuron 2                                | 11.1 | 233.2   | 72      | 71 | 10 | 37 | 12 |
| 137. | DMF (2,4-Dimethyl-phenyl-formamidine) 1 | 9.9  | 151     | 107     | 66 | 10 | 43 | 6  |
| 138. | DMF (2,4-Dimethyl-phenyl-formamidine) 2 | 9.9  | 151     | 106     | 66 | 10 | 27 | 6  |
| 139. | Dodine 1                                | 13   | 228.305 | 57      | 70 | 10 | 43 | 8  |
| 140. | Dodine 2                                | 13.1 | 228.305 | 60      | 70 | 10 | 41 | 10 |
| 141. | Epoxiconazole 1                         | 12.5 | 330.2   | 101.1   | 51 | 10 | 71 | 4  |
| 142. | Epoxiconazole 2                         | 12.5 | 330.2   | 121.1   | 51 | 10 | 31 | 8  |
| 143. | Etaconazole 1                           | 13   | 329.476 | 161     | 46 | 10 | 53 | 14 |
| 144. | Etaconazole 2                           | 13   | 329.476 | 55.163  | 46 | 10 | 57 | 8  |
| 145. | Ethiofencarb 1a                         | 10.6 | 226.1   | 106.901 | 61 | 10 | 21 | 4  |
| 146. | Ethiofencarb 2a                         | 10.6 | 226.1   | 164.1   | 61 | 10 | 11 | 4  |
| 147. | Ethirimol 1                             | 11.6 | 210.2   | 140.1   | 55 | 10 | 23 | 9  |
| 148. | Ethirimol 2                             | 11.6 | 210.2   | 98.1    | 55 | 10 | 28 | 9  |
| 149. | Ethofenprox 1                           | 19   | 394.24  | 177.07  | 16 | 10 | 23 | 12 |
| 150. | Ethofenprox 2                           | 19   | 394.24  | 107.1   | 16 | 10 | 53 | 10 |
| 151. | Etoxazole 1                             | 15.8 | 360     | 113     | 66 | 10 | 79 | 8  |
| 152. | Etoxazole 2                             | 15.8 | 360     | 141     | 66 | 10 | 37 | 8  |
| 153. | Etrimphos 1                             | 13.6 | 293.1   | 125     | 60 | 10 | 33 | 9  |
| 154. | Etrimphos 2                             | 13.6 | 293.1   | 265.1   | 60 | 10 | 21 | 10 |
| 155. | Fenamidon 1                             | 12.1 | 312.1   | 92.2    | 50 | 10 | 33 | 9  |
| 156. | Fenamidon 2                             | 12.1 | 312.1   | 236.1   | 50 | 10 | 19 | 10 |
| 157. | Fenamiphos 1                            | 13   | 304.1   | 217.1   | 55 | 10 | 31 | 9  |
| 158. | Fenamiphos 2                            | 13   | 304.1   | 202     | 55 | 10 | 45 | 10 |
| 159. | Fenazaquin 1                            | 17.6 | 307     | 161     | 51 | 10 | 31 | 8  |
| 160. | Fenazaquin 2                            | 17.6 | 307     | 147     | 51 | 10 | 25 | 8  |
| 161. | Fenbuconazole 1                         | 12.4 | 337.3   | 125     | 56 | 10 | 39 | 6  |
| 162. | Fenbuconazole 2                         | 12.4 | 337.3   | 69.9    | 56 | 10 | 47 | 2  |
| 163. | Fenhexamid 1                            | 12.2 | 302     | 55      | 86 | 10 | 63 | 10 |
| 164. | Fenhexamid 2                            | 12.2 | 302     | 97      | 86 | 10 | 35 | 10 |
| 165. | Fenoxap-p-ethyl 1                       | 11   | 362     | 121     | 46 | 10 | 37 | 10 |
| 166. | Fenoxap-p-ethyl 2                       | 11   | 362     | 288.1   | 46 | 10 | 23 | 10 |
| 167. | Fenoxycarb 1                            | 12.7 | 302.3   | 116.1   | 46 | 10 | 17 | 8  |
| 168. | Fenoxycarb 2                            | 12.7 | 302.3   | 88.1    | 46 | 10 | 29 | 6  |
| 169. | Fenpropimorph 1                         | 19.5 | 304.241 | 147.1   | 51 | 10 | 41 | 12 |
| 170. | Fenpropimorph 2                         | 19.5 | 304.241 | 117.1   | 51 | 10 | 77 | 6  |
| 171. | Fenpyroximate 1                         | 16.2 | 422     | 135.1   | 76 | 10 | 45 | 10 |
| 172. | Fenpyroximate 2                         | 16.2 | 422     | 366     | 76 | 10 | 20 | 10 |
| 173. | Fenthion 1                              | 13.1 | 279     | 169     | 66 | 10 | 35 | 10 |
| 174. | Fenthion 2                              | 13.1 | 279     | 247.1   | 66 | 10 | 19 | 16 |
| 175. | Fenthion sulfon 1                       | 10.5 | 311.1   | 125     | 60 | 10 | 22 | 9  |
| 176. | Fenthion sulfon 2                       | 10.5 | 311.1   | 109     | 60 | 10 | 28 | 9  |
| 177. | Fenuron 1                               | 8.0  | 165.00  | 72.1    | 60 | 10 | 17 | 9  |
| 178. | Fenuron 2                               | 8.0  | 165.00  | 46.3    | 60 | 10 | 18 | 9  |
| 179. | Flazasulfuron 1                         | 7.7  | 408.1   | 182.1   | 41 | 10 | 25 | 8  |

|      |                           |      |         |         |    |    |    |    |
|------|---------------------------|------|---------|---------|----|----|----|----|
| 180. | Flazasulfuron 2           | 7.7  | 408.1   | 226.9   | 41 | 10 | 25 | 8  |
| 181. | Florosulam 1              | 6.6  | 360     | 191.9   | 50 | 10 | 35 | 10 |
| 182. | Florosulam 2              | 6.6  | 360     | 129.1   | 71 | 10 | 23 | 8  |
| 183. | Fluazifop-p-butyl 1       | 14   | 384.1   | 282.1   | 50 | 10 | 35 | 10 |
| 184. | Fluazifop-p-butyl 2       | 14   | 384.1   | 328     | 50 | 10 | 20 | 10 |
| 185. | Flufenacet 1              | 12.4 | 364.1   | 194.2   | 11 | 10 | 17 | 8  |
| 186. | Flufenacet 2              | 12.4 | 364.1   | 152.1   | 11 | 10 | 27 | 8  |
| 187. | Flufenoxuron 1            | 15   | 489.1   | 141.1   | 50 | 10 | 50 | 10 |
| 188. | Flufenoxuron 2            | 15   | 489.1   | 158     | 50 | 10 | 35 | 10 |
| 189. | Fluometuron 1             | 10.5 | 233     | 160     | 61 | 10 | 39 | 8  |
| 190. | Fluometuron 2             | 10.5 | 233     | 72      | 61 | 10 | 57 | 2  |
| 191. | Fluroxypyr 1              | 5.8  | 255.015 | 209     | 56 | 10 | 23 | 12 |
| 192. | Fluroxypyr 2              | 5.8  | 255.015 | 181     | 56 | 10 | 33 | 12 |
| 193. | Flurtamon 1               | 11.8 | 335.541 | 179.181 | 61 | 10 | 59 | 10 |
| 194. | Flurtamon 2               | 11.8 | 335.541 | 178.187 | 61 | 10 | 71 | 14 |
| 195. | Fluthiacet methyl 1       | 11.9 | 404.768 | 344.777 | 60 | 10 | 33 | 18 |
| 196. | Fluthiacet methyl 2       | 11.9 | 404.768 | 214.909 | 60 | 10 | 57 | 12 |
| 197. | Flutriafol 1              | 11.1 | 302.1   | 122.9   | 50 | 10 | 39 | 9  |
| 198. | Flutriafol 2              | 11.1 | 302.1   | 109     | 50 | 10 | 43 | 10 |
| 199. | Fonofos 1                 | 13.8 | 247     | 109.1   | 50 | 10 | 25 | 9  |
| 200. | Fonofos 2                 | 13.8 | 247     | 137     | 50 | 10 | 15 | 9  |
| 201. | Fosthiazate 1             | 10.5 | 284.2   | 104     | 51 | 10 | 29 | 6  |
| 202. | Fosthiazate 2             | 10.5 | 284.2   | 228     | 51 | 10 | 15 | 14 |
| 203. | Fuberidazol 1             | 9.9  | 185     | 157     | 50 | 10 | 22 | 9  |
| 204. | Fuberidazol 2             | 9.9  | 185     | 156     | 50 | 10 | 27 | 10 |
| 205. | Furathiocarb 1            | 14.7 | 383.2   | 195     | 51 | 10 | 23 | 8  |
| 206. | Furathiocarb 2            | 14.7 | 383.2   | 251.9   | 51 | 10 | 19 | 8  |
| 207. | Halfenprox 1              | 20   | 494.1   | 183.1   | 46 | 10 | 27 | 9  |
| 208. | Halfenprox 2              | 20   | 494.1   | 168     | 46 | 10 | 53 | 10 |
| 209. | Haloxypyr methyl 1        | 13.8 | 376.1   | 315.9   | 91 | 10 | 23 | 8  |
| 210. | Haloxypyr methyl 2        | 13.8 | 376.1   | 287.8   | 91 | 10 | 33 | 8  |
| 211. | Haloxypyr-2-ethoxyethyl 1 | 14.5 | 434     | 316     | 81 | 10 | 25 | 8  |
| 212. | Haloxypyr-2-ethoxyethyl 2 | 14.5 | 434     | 288     | 81 | 10 | 35 | 9  |
| 213. | Heptenophos 1             | 11.1 | 251     | 109     | 51 | 10 | 45 | 6  |
| 214. | Heptenophos 2             | 11.1 | 251     | 127     | 51 | 10 | 31 | 8  |
| 215. | Hexazinone 1              | 10.2 | 253.2   | 171.1   | 16 | 10 | 21 | 8  |
| 216. | Hexazinone 2              | 10.2 | 253.2   | 71.1    | 16 | 10 | 47 | 8  |
| 217. | Hexythiazox 1             | 15.5 | 353.1   | 167.9   | 66 | 10 | 37 | 10 |
| 218. | Hexythiazox 2             | 15.5 | 353.1   | 228     | 66 | 10 | 23 | 16 |
| 219. | Imazalil 1                | 13.2 | 297     | 159     | 26 | 10 | 31 | 10 |
| 220. | Imazalil 2                | 13.2 | 297     | 201     | 26 | 10 | 23 | 10 |
| 221. | Imazamox 1                | 4.7  | 306.164 | 264     | 66 | 10 | 27 | 14 |
| 222. | Imazamox 2                | 4.7  | 306.164 | 193.1   | 66 | 10 | 37 | 10 |
| 223. | Imazapyr 1                | 3.9  | 262.1   | 217.1   | 56 | 10 | 27 | 8  |
| 224. | Imazapyr 2                | 3.9  | 262.1   | 149.1   | 56 | 10 | 35 | 8  |
| 225. | Imidacloprid 1            | 7.1  | 256.2   | 175.1   | 50 | 10 | 35 | 10 |
| 226. | Imidacloprid 2            | 7.1  | 256.2   | 209.2   | 50 | 10 | 35 | 10 |
| 227. | Indoxacarb 1              | 13.5 | 528     | 203.1   | 86 | 10 | 57 | 12 |
| 228. | Indoxacarb 2              | 13.5 | 528     | 56      | 86 | 10 | 79 | 10 |

|      |                      |      |       |       |     |    |    |    |
|------|----------------------|------|-------|-------|-----|----|----|----|
| 229. | Iprodione 1          | 12.8 | 330   | 245.1 | 121 | 10 | 53 | 9  |
| 230. | Iprodione 2          | 12.8 | 330   | 288.1 | 121 | 10 | 53 | 9  |
| 231. | Iprovalicarb 1       | 12.3 | 321.2 | 119.1 | 46  | 10 | 23 | 6  |
| 232. | Iprovalicarb 2       | 12.3 | 321.2 | 203.1 | 46  | 10 | 13 | 14 |
| 233. | Isazofos 1           | 12.7 | 314   | 162   | 61  | 10 | 21 | 7  |
| 234. | Isazofos 2           | 12.7 | 314   | 120   | 61  | 10 | 35 | 6  |
| 235. | Isocarbamide 1       | 8.8  | 186.1 | 87.1  | 50  | 10 | 16 | 6  |
| 236. | Isocarbamide 2       | 8.8  | 186.1 | 130.1 | 50  | 10 | 12 | 6  |
| 237. | Isomethiozin 1       | 13.9 | 269.1 | 200.2 | 34  | 10 | 23 | 10 |
| 238. | Isomethiozin 2       | 13.9 | 269.1 | 172.2 | 34  | 10 | 33 | 8  |
| 239. | Isoproturon 1        | 11   | 207.3 | 165.1 | 76  | 10 | 17 | 8  |
| 240. | Isoproturon 2        | 11   | 207.3 | 72    | 76  | 10 | 33 | 12 |
| 241. | Isoxaflutole 1       | 11   | 377   | 251   | 46  | 10 | 27 | 8  |
| 242. | Isoxaflutole 2       | 11   | 360.1 | 251   | 81  | 10 | 21 | 8  |
| 243. | Lenacil 1            | 11   | 235.1 | 153.1 | 56  | 10 | 21 | 8  |
| 244. | Lenacil 2            | 11   | 235.1 | 136.1 | 56  | 10 | 43 | 8  |
| 245. | Linuron 1            | 11.7 | 249.1 | 160   | 50  | 10 | 20 | 10 |
| 246. | Linuron 2            | 11.7 | 249.1 | 182.1 | 50  | 10 | 20 | 10 |
| 247. | Lufenuron 1          | 14.3 | 511   | 141   | 50  | 10 | 35 | 10 |
| 248. | Lufenuron 2          | 14.3 | 511   | 158   | 86  | 10 | 35 | 10 |
| 249. | Malaoxon 1           | 10   | 315.1 | 127   | 86  | 10 | 20 | 10 |
| 250. | Malaoxon 2           | 10   | 315.1 | 99    | 50  | 10 | 35 | 10 |
| 251. | Malathion 1          | 12   | 331   | 99    | 50  | 10 | 20 | 10 |
| 252. | Malathion 2          | 12   | 331   | 211.1 | 50  | 10 | 20 | 10 |
| 253. | Mecarbam 1           | 12.5 | 330.2 | 227.1 | 36  | 10 | 13 | 14 |
| 254. | Mecarbam 2           | 12.5 | 330.2 | 96.9  | 36  | 10 | 55 | 4  |
| 255. | Mepanipyrim 1        | 12.5 | 224.1 | 106.1 | 46  | 10 | 37 | 6  |
| 256. | Mepanipyrim 2        | 12.5 | 224.1 | 77.1  | 96  | 10 | 37 | 6  |
| 257. | Metalaxyl 1          | 11.2 | 280.2 | 160.1 | 96  | 10 | 59 | 12 |
| 258. | Metalaxyl 2          | 11.2 | 280.2 | 220.2 | 50  | 10 | 20 | 10 |
| 259. | Metalaxyl-M 1        | 11.5 | 280.1 | 220.2 | 55  | 10 | 21 | 11 |
| 260. | Metalaxyl-M 2        | 11.5 | 280.1 | 160.3 | 49  | 10 | 22 | 7  |
| 261. | Metamitron 1         | 7.9  | 203.1 | 77.1  | 76  | 10 | 47 | 12 |
| 262. | Metamitron 2         | 7.9  | 203.1 | 175.1 | 76  | 10 | 25 | 12 |
| 263. | Metazachlor 1        | 11.2 | 278.3 | 134   | 36  | 10 | 29 | 8  |
| 264. | Metazachlor 2        | 11.2 | 278.3 | 210   | 36  | 10 | 15 | 14 |
| 265. | Metconazole 1        | 13.7 | 320.1 | 125   | 61  | 10 | 49 | 6  |
| 266. | Metconazole 2        | 13.7 | 320.1 | 70.1  | 56  | 10 | 45 | 6  |
| 267. | Methabenzthiazuron 1 | 10.9 | 222.1 | 165.1 | 11  | 10 | 23 | 8  |
| 268. | Methabenzthiazuron 2 | 10.9 | 222.1 | 150   | 11  | 10 | 23 | 8  |
| 269. | Methacrifos 1        | 11.7 | 241.1 | 209.1 | 41  | 10 | 15 | 9  |
| 270. | Methacrifos 2        | 11.7 | 241.1 | 125.1 | 41  | 10 | 25 | 9  |
| 271. | Methamidophos 1      | 3.3  | 142.2 | 112   | 41  | 10 | 43 | 8  |
| 272. | Methamidophos 2      | 3.3  | 142.2 | 94    | 51  | 10 | 21 | 16 |
| 273. | Methidathion 1       | 11.7 | 302.9 | 145.1 | 46  | 10 | 15 | 9  |
| 274. | Methidathion 2       | 11.7 | 302.9 | 85.1  | 46  | 10 | 27 | 9  |
| 275. | Methiocarb 1         | 11.9 | 243   | 121.1 | 50  | 10 | 35 | 10 |
| 276. | Methiocarb 2         | 11.9 | 243   | 169.1 | 50  | 10 | 20 | 10 |
| 277. | Methoprotetryne 1    | 12.2 | 272.2 | 170.2 | 50  | 10 | 28 | 9  |

|      |                     |      |         |         |    |    |    |    |
|------|---------------------|------|---------|---------|----|----|----|----|
| 278. | Methoprottryne 2    | 12.2 | 272.2   | 198.2   | 50 | 10 | 22 | 10 |
| 279. | Methoxyfenozide 1   | 12.1 | 369     | 133     | 50 | 10 | 35 | 10 |
| 280. | Methoxyfenozide 2   | 12.1 | 369     | 149     | 50 | 10 | 20 | 10 |
| 281. | Metobromuron 1      | 11   | 259.2   | 148.1   | 61 | 10 | 21 | 10 |
| 282. | Metobromuron 2      | 11   | 259.2   | 170.2   | 61 | 10 | 25 | 10 |
| 283. | Metolachlor 1       | 12.9 | 284.2   | 252.2   | 60 | 10 | 21 | 18 |
| 284. | Metolachlor 2       | 12.9 | 284.2   | 176.2   | 60 | 10 | 33 | 18 |
| 285. | Metolachlor S 1     | 13.2 | 285     | 131     | 36 | 10 | 75 | 10 |
| 286. | Metolachlor S 2     | 13.2 | 285     | 134     | 36 | 10 | 47 | 8  |
| 287. | Metosulam 1         | 8.7  | 418     | 174.9   | 80 | 10 | 35 | 10 |
| 288. | Metosulam 2         | 8.7  | 418     | 140.1   | 80 | 10 | 79 | 10 |
| 289. | Metoxuron 1         | 9.1  | 229.2   | 72      | 66 | 10 | 37 | 12 |
| 290. | Metoxuron 2         | 9.1  | 229.2   | 156.2   | 66 | 10 | 35 | 10 |
| 291. | Metrafenon 1        | 13.9 | 409.1   | 209.1   | 41 | 10 | 21 | 9  |
| 292. | Metrafenon 2        | 13.9 | 409.1   | 226.9   | 41 | 10 | 25 | 9  |
| 293. | Monocrotophos 1     | 6.2  | 224     | 127     | 50 | 10 | 20 | 10 |
| 294. | Monocrotophos 2     | 6.2  | 224     | 98      | 50 | 10 | 20 | 10 |
| 295. | Monolinuron 1       | 10.7 | 215.2   | 126     | 51 | 10 | 25 | 8  |
| 296. | Monolinuron 2       | 10.7 | 215.2   | 148.1   | 51 | 10 | 21 | 10 |
| 297. | Monuron 1           | 9.9  | 199.1   | 72      | 51 | 10 | 29 | 8  |
| 298. | Monuron 2           | 9.9  | 199.1   | 126     | 51 | 10 | 35 | 8  |
| 299. | Myclobutanil 1      | 12   | 289     | 125     | 50 | 10 | 50 | 10 |
| 300. | Myclobutanil 2      | 12   | 289     | 70      | 50 | 10 | 50 | 10 |
| 301. | Nicosulfuron 1      | 6.1  | 411     | 182     | 56 | 10 | 31 | 10 |
| 302. | Nicosulfuron 2      | 6.1  | 411     | 106     | 61 | 10 | 51 | 6  |
| 303. | Nitenpyram 1        | 5.2  | 271.1   | 126.1   | 51 | 10 | 39 | 8  |
| 304. | Nitenpyram 2        | 5.2  | 271.1   | 237.2   | 51 | 10 | 25 | 8  |
| 305. | Norflurazon 1       | 11.4 | 304     | 284.1   | 81 | 10 | 31 | 10 |
| 306. | Norflurazon 2       | 11.4 | 304     | 160.1   | 81 | 10 | 41 | 11 |
| 307. | Novaluron 1         | 13.7 | 492.948 | 141.132 | 81 | 10 | 65 | 8  |
| 308. | Novaluron 2         | 13.7 | 492.948 | 158.111 | 81 | 10 | 29 | 10 |
| 309. | Omethoate 1         | 4.2  | 214     | 125     | 60 | 10 | 33 | 10 |
| 310. | Omethoate 2         | 4.2  | 214     | 183     | 60 | 10 | 15 | 10 |
| 311. | Oxamyl 1            | 5.2  | 237     | 72      | 50 | 10 | 35 | 10 |
| 312. | Oxamyl 2            | 5.2  | 237     | 90.1    | 50 | 10 | 20 | 10 |
| 313. | Oxycarboxin 1       | 8.6  | 268     | 175.1   | 56 | 10 | 19 | 6  |
| 314. | Oxycarboxin 2       | 8.6  | 268     | 147     | 56 | 10 | 29 | 6  |
| 315. | Oxydemeton methyl 1 | 5.4  | 247     | 108.9   | 66 | 10 | 37 | 6  |
| 316. | Oxydemeton methyl 2 | 5.4  | 247     | 169     | 66 | 10 | 21 | 16 |
| 317. | Paraoxon ethyl 1    | 11   | 276.1   | 220     | 66 | 10 | 25 | 9  |
| 318. | Paraoxon ethyl 2    | 11   | 276.1   | 94.2    | 66 | 10 | 45 | 9  |
| 319. | Paraoxon methyl 1   | 9.4  | 248     | 109.1   | 70 | 10 | 35 | 9  |
| 320. | Paraoxon methyl 2   | 9.4  | 248     | 202.1   | 70 | 10 | 25 | 9  |
| 321. | Parathion ethyl 1   | 13.3 | 292     | 236.1   | 66 | 10 | 21 | 9  |
| 322. | Parathion ethyl 2   | 13.3 | 292     | 97      | 66 | 10 | 39 | 9  |
| 323. | Pebulat 1           | 14.3 | 204.1   | 57.2    | 50 | 10 | 16 | 6  |
| 324. | Pebulat 2           | 14.3 | 204.1   | 128     | 50 | 10 | 11 | 6  |
| 325. | Penconazole 1       | 13.1 | 284     | 159     | 41 | 10 | 39 | 10 |
| 326. | Penconazole 2       | 13.1 | 284     | 70      | 41 | 10 | 29 | 10 |

|      |                     |      |         |         |    |    |    |    |
|------|---------------------|------|---------|---------|----|----|----|----|
| 327. | Pencycuron 1        | 13.6 | 329.1   | 125     | 41 | 10 | 33 | 10 |
| 328. | Pencycuron 2        | 13.6 | 329.1   | 99      | 41 | 10 | 83 | 10 |
| 329. | Phenkapton 1        | 17   | 378.977 | 192.971 | 36 | 10 | 25 | 16 |
| 330. | Phenkapton 2        | 17   | 378.977 | 199.019 | 36 | 10 | 15 | 10 |
| 331. | Phenmedipham 1      | 11.1 | 301.3   | 136     | 71 | 10 | 27 | 8  |
| 332. | Phenmedipham 2      | 11.1 | 301.3   | 168.1   | 71 | 10 | 13 | 12 |
| 333. | Phenothrin 1        | 18.4 | 351.1   | 183.2   | 81 | 10 | 31 | 10 |
| 334. | Phenothrin 2        | 18.4 | 351.1   | 128     | 81 | 10 | 77 | 10 |
| 335. | Phenthoate 1        | 13   | 321     | 79      | 50 | 10 | 50 | 10 |
| 336. | Phenthoate 2        | 13   | 321     | 247.2   | 50 | 10 | 20 | 10 |
| 337. | Phorate 1           | 14.0 | 261     | 75      | 56 | 10 | 31 | 9  |
| 338. | Phorate 2           | 14.0 | 261     | 47.152  | 56 | 10 | 47 | 9  |
| 339. | Phosalone 1         | 13.5 | 368     | 111     | 50 | 10 | 50 | 10 |
| 340. | Phosalone 2         | 13.5 | 368     | 182     | 50 | 10 | 20 | 10 |
| 341. | Phosmet 1           | 11.8 | 317.9   | 160     | 46 | 10 | 19 | 6  |
| 342. | Phosmet 2           | 11.8 | 317.9   | 133.1   | 49 | 10 | 49 | 6  |
| 343. | Phosphamidon 1      | 9.4  | 300     | 127.1   | 56 | 10 | 27 | 9  |
| 344. | Phosphamidon 2      | 9.4  | 300     | 174.1   | 56 | 10 | 19 | 9  |
| 345. | Phoxim 1            | 13.4 | 299     | 129.1   | 26 | 10 | 17 | 8  |
| 346. | Phoxim 2            | 13.4 | 299     | 77.1    | 26 | 10 | 41 | 8  |
| 347. | Picoxystrobin 1     | 12.7 | 368.1   | 145     | 36 | 10 | 27 | 8  |
| 348. | Picoxystrobin 2     | 12.7 | 368.1   | 205.2   | 36 | 10 | 15 | 8  |
| 349. | Pirimicarb 1        | 11   | 239.2   | 182.3   | 50 | 10 | 20 | 10 |
| 350. | Pirimicarb 2        | 11   | 239.2   | 72      | 50 | 10 | 20 | 10 |
| 351. | Pirimiphos methyl 1 | 14.0 | 306.1   | 164.1   | 46 | 10 | 29 | 9  |
| 352. | Pirimiphos methyl 2 | 14.0 | 306.1   | 108.1   | 46 | 10 | 39 | 9  |
| 353. | Prochloraz 1        | 13.5 | 376     | 308     | 50 | 10 | 30 | 10 |
| 354. | Prochloraz 2        | 13.5 | 376     | 70.1    | 50 | 10 | 50 | 10 |
| 355. | Profenofos 1        | 14.7 | 372.9   | 302.9   | 56 | 10 | 25 | 9  |
| 356. | Profenofos 2        | 14.7 | 372.9   | 97      | 56 | 10 | 43 | 9  |
| 357. | Prometryn 1         | 12.7 | 242     | 158     | 50 | 10 | 35 | 10 |
| 358. | Prometryn 2         | 12.7 | 242     | 200     | 50 | 10 | 35 | 10 |
| 359. | Propamocarb 1       | 6.4  | 189     | 102     | 50 | 10 | 20 | 10 |
| 360. | Propamocarb 2       | 6.4  | 189     | 144.1   | 50 | 10 | 20 | 10 |
| 361. | Propanil 1          | 12.2 | 218     | 162     | 50 | 10 | 35 | 9  |
| 362. | Propanil 2          | 12.2 | 218     | 127     | 50 | 10 | 23 | 10 |
| 363. | Propaquizafop 1     | 14.9 | 444.1   | 299.1   | 76 | 10 | 31 | 8  |
| 364. | Propaquizafop 2     | 14.9 | 444.1   | 100     | 76 | 10 | 27 | 8  |
| 365. | Prophos 1           | 13.3 | 243.1   | 97.1    | 60 | 10 | 33 | 9  |
| 366. | Prophos 2           | 13.3 | 243.1   | 131.1   | 60 | 10 | 23 | 9  |
| 367. | Prosulfuron 1       | 9.3  | 420.1   | 141.1   | 56 | 10 | 27 | 8  |
| 368. | Prosulfuron 2       | 9.3  | 420.1   | 167     | 56 | 10 | 25 | 8  |
| 369. | Pyraclostrobin 1    | 13.3 | 388     | 163     | 41 | 10 | 33 | 10 |
| 370. | Pyraclostrobin 2    | 13.3 | 388     | 194     | 46 | 10 | 33 | 12 |
| 371. | Pyraflufen ethyl 1  | 13.2 | 413     | 339     | 91 | 10 | 25 | 10 |
| 372. | Pyraflufen ethyl 2  | 13.2 | 413     | 253     | 91 | 10 | 43 | 9  |
| 373. | Pyridaphenthion 1   | 12.4 | 341     | 189     | 46 | 10 | 29 | 9  |
| 374. | Pyridaphenthion 2   | 12.4 | 341     | 205.1   | 46 | 10 | 27 | 9  |
| 375. | Pyridate 1          | 17.9 | 379.135 | 207     | 51 | 10 | 25 | 12 |



|      |                           |      |         |         |     |    |     |    |
|------|---------------------------|------|---------|---------|-----|----|-----|----|
| 376. | Pyridate 2                | 17.9 | 379.135 | 351.2   | 51  | 10 | 15  | 20 |
| 377. | Pyrimiphos ethyl 1        | 15.2 | 334.1   | 198.1   | 50  | 10 | 29  | 9  |
| 378. | Pyrimiphos ethyl 2        | 15.2 | 334.1   | 182.2   | 50  | 10 | 27  | 9  |
| 379. | Pyriproxyfen 1            | 15.4 | 322.2   | 185.1   | 50  | 10 | 29  | 10 |
| 380. | Pyriproxyfen 2            | 15.4 | 322.2   | 96      | 50  | 10 | 20  | 10 |
| 381. | Quinmerac 1               | 5.6  | 222     | 204.1   | 21  | 10 | 23  | 8  |
| 382. | Quinmerac 2               | 5.6  | 222     | 141     | 21  | 10 | 43  | 8  |
| 383. | Quizalofop-p-ethyl 1      | 14.6 | 373     | 255     | 50  | 10 | 50  | 10 |
| 384. | Quizalofop-p-ethyl 2      | 14.6 | 373     | 299     | 50  | 10 | 20  | 10 |
| 385. | Resmethrine 1             | 17.6 | 356.2   | 171.2   | 21  | 10 | 21  | 8  |
| 386. | Resmethrine 2             | 17.6 | 356.2   | 128.1   | 21  | 10 | 57  | 8  |
| 387. | Rimsulfuron 1             | 6.5  | 432.1   | 182     | 71  | 10 | 29  | 8  |
| 388. | Rimsulfuron 2             | 6.5  | 432.1   | 324.9   | 71  | 10 | 21  | 8  |
| 389. | Sebuthylazine 1           | 12   | 230.1   | 174.2   | 21  | 10 | 25  | 8  |
| 390. | Sebuthylazine 2           | 12   | 230.1   | 104.2   | 21  | 10 | 41  | 8  |
| 391. | Sethoxydim 1              | 9.7  | 328.1   | 282.201 | 51  | 10 | 17  | 8  |
| 392. | Sethoxydim 2              | 9.7  | 328.1   | 178.101 | 51  | 10 | 25  | 8  |
| 393. | Silthiofam 1              | 13.2 | 269.06  | 253.111 | 36  | 10 | 17  | 14 |
| 394. | Silthiofam 2              | 13.2 | 269.06  | 139.033 | 36  | 10 | 51  | 10 |
| 395. | Simazine 1                | 10.1 | 202.2   | 131.9   | 61  | 10 | 27  | 8  |
| 396. | Simazine 2                | 10.1 | 202.2   | 124     | 61  | 10 | 27  | 2  |
| 397. | Simetryn 1                | 11.2 | 214.1   | 124.2   | 31  | 10 | 27  | 8  |
| 398. | Simetryn 2                | 11.2 | 214.1   | 144     | 31  | 10 | 27  | 8  |
| 399. | Spinosad A 1              | 19.2 | 732.472 | 142.1   | 101 | 10 | 41  | 8  |
| 400. | Spinosad A 2              | 19.2 | 732.472 | 98.1    | 101 | 10 | 103 | 6  |
| 401. | Spinosad D 1              | 20.2 | 746.476 | 142.1   | 96  | 10 | 43  | 10 |
| 402. | Spinosad D 2              | 20.2 | 746.476 | 98.2    | 96  | 10 | 105 | 6  |
| 403. | Spirotetramat 1           | 12.7 | 374.2   | 330.2   | 60  | 10 | 17  | 9  |
| 404. | Spirotetramat 2           | 12.7 | 374.2   | 302.2   | 60  | 10 | 19  | 9  |
| 405. | Spiroxamin 1              | 17   | 298.3   | 100.3   | 56  | 10 | 45  | 6  |
| 406. | Spiroxamin 2              | 17   | 298.3   | 144.2   | 56  | 10 | 29  | 8  |
| 407. | Sulfotep 1                | 13.3 | 323     | 115     | 46  | 10 | 39  | 9  |
| 408. | Sulfotep 2                | 13.3 | 323     | 97.1    | 46  | 10 | 45  | 9  |
| 409. | Sulprofos 1               | 7.8  | 323     | 247.1   | 50  | 10 | 17  | 9  |
| 410. | Sulprofos 2               | 7.8  | 323     | 219     | 50  | 10 | 21  | 9  |
| 411. | Tebuconazole 1            | 13.1 | 308     | 125     | 50  | 10 | 35  | 10 |
| 412. | Tebuconazole 2            | 13.1 | 308     | 70.1    | 50  | 10 | 35  | 10 |
| 413. | Tebufenozide 1            | 12.6 | 353     | 133     | 50  | 10 | 20  | 10 |
| 414. | Tebufenozide 2            | 12.6 | 353     | 297.2   | 50  | 10 | 20  | 10 |
| 415. | Tebufenpyrad 1            | 14.8 | 334.3   | 145     | 66  | 10 | 37  | 8  |
| 416. | Tebufenpyrad 2            | 14.8 | 334.3   | 117     | 66  | 10 | 74  | 10 |
| 417. | Tebutam 1                 | 13.2 | 234.2   | 91      | 46  | 10 | 29  | 9  |
| 418. | Tebutam 2                 | 13.2 | 234.2   | 192.2   | 46  | 10 | 19  | 9  |
| 419. | Tepraloxydim 1            | 7.5  | 342     | 166.001 | 46  | 10 | 31  | 12 |
| 420. | Tepraloxydim 2            | 7.5  | 342     | 250.001 | 46  | 10 | 19  | 24 |
| 421. | Terbumeton 1              | 12.3 | 226.1   | 170.1   | 50  | 10 | 15  | 9  |
| 422. | Terbumeton 2              | 12.3 | 226.1   | 114.1   | 50  | 10 | 25  | 9  |
| 423. | Terbuthialzine desethyl 1 | 10.4 | 202.1   | 145.9   | 26  | 10 | 23  | 10 |
| 424. | Terbuthialzine desethyl 2 | 10.4 | 202.1   | 104.2   | 26  | 10 | 37  | 10 |

|      |                      |      |         |         |    |    |    |    |
|------|----------------------|------|---------|---------|----|----|----|----|
| 425. | Terbutylazine 1      | 12   | 230     | 104     | 50 | 10 | 50 | 10 |
| 426. | Terbutylazine 2      | 12   | 230     | 174     | 50 | 10 | 20 | 10 |
| 427. | Tetramethrin 1       | 15.0 | 349.2   | 164.2   | 50 | 10 | 29 | 9  |
| 428. | Tetramethrin 2       | 15.0 | 349.2   | 135.2   | 50 | 10 | 23 | 9  |
| 429. | Thiabendazole 1      | 9.4  | 202.1   | 131     | 50 | 10 | 50 | 10 |
| 430. | Thiabendazole 2      | 9.4  | 202.1   | 175     | 50 | 10 | 35 | 10 |
| 431. | Thiacloprid 1        | 8.3  | 253.2   | 126     | 50 | 10 | 20 | 10 |
| 432. | Thiacloprid 2        | 8.3  | 253.2   | 186     | 50 | 10 | 20 | 10 |
| 433. | Thiamethoxam 1       | 6    | 292     | 211     | 50 | 10 | 20 | 10 |
| 434. | Thiamethoxam 2       | 6    | 292     | 181.2   | 50 | 10 | 35 | 10 |
| 435. | Thiodicarb 1         | 10.2 | 355.072 | 88.1    | 61 | 10 | 31 | 6  |
| 436. | Thiodicarb 2         | 10.2 | 355.072 | 107.9   | 61 | 10 | 23 | 6  |
| 437. | Thiophanate methyl 1 | 9.8  | 343.077 | 151.1   | 50 | 10 | 20 | 8  |
| 438. | Thiophanate methyl 2 | 9.8  | 343.077 | 192.2   | 50 | 10 | 20 | 8  |
| 439. | Tolclofos methyl 1   | 14   | 301     | 268.9   | 46 | 10 | 23 | 9  |
| 440. | Tolclofos methyl 2   | 14   | 301     | 175     | 46 | 10 | 35 | 9  |
| 441. | Tolyfluanid 1        | 12.9 | 364     | 137     | 50 | 10 | 35 | 10 |
| 442. | Tolyfluanid 2        | 12.9 | 364     | 238     | 50 | 10 | 20 | 10 |
| 443. | Triadimefon 1        | 12.5 | 294     | 197.2   | 55 | 10 | 21 | 9  |
| 444. | Triadimefon 2        | 12.5 | 294     | 225.1   | 55 | 10 | 19 | 10 |
| 445. | Tri-allate 1         | 16.0 | 307.997 | 85.026  | 86 | 10 | 73 | 4  |
| 446. | Tri-allate 2         | 16.0 | 307.997 | 146.947 | 86 | 10 | 37 | 6  |
| 447. | Triamiphos 1         | 14.3 | 295.122 | 278.03  | 36 | 10 | 11 | 14 |
| 448. | Triamiphos 2         | 14.3 | 295.122 | 109.101 | 36 | 10 | 37 | 6  |
| 449. | Triazophos 1         | 12.1 | 314.2   | 119     | 50 | 10 | 50 | 10 |
| 450. | Triazophos 2         | 12.1 | 314.2   | 162     | 50 | 10 | 20 | 10 |
| 451. | Trichlorofon 1       | 7.6  | 274     | 108.9   | 26 | 10 | 31 | 10 |
| 452. | Trichlorofon 2       | 7.6  | 274     | 221     | 26 | 10 | 21 | 10 |
| 453. | Trifloxystrobin 1    | 13.8 | 409     | 186     | 50 | 10 | 20 | 10 |
| 454. | Trifloxystrobin 2    | 13.8 | 409     | 206.2   | 50 | 10 | 20 | 10 |
| 455. | Triforine 1          | 11.2 | 434.961 | 389.9   | 50 | 10 | 17 | 22 |
| 456. | Triforine 2          | 11.2 | 432.961 | 388     | 50 | 10 | 17 | 12 |

ID—compound (1—quantifier ion, 2—qualifier ion); RT—retention time; Q1—pseudo-molecular ion; Q3—fragment ion; DP—declustering potential; EP—entrance potential; CE—collision energy; CXP—collision cell exit potential.

**Table S2.** List of pesticides determined in the negative ionization mode.

| No. | ID           | RT<br>(min) | Q1      | Q3    | DP  | EP  | CE  | CXP |
|-----|--------------|-------------|---------|-------|-----|-----|-----|-----|
| 1.  | 2,4 D 1      | 6.9         | 219     | 161   | -40 | -10 | -18 | -9  |
| 2.  | 2,4 D 2      | 6.9         | 219     | 125   | -40 | -10 | -36 | -7  |
| 3.  | 2,4 DB 1     | 8.1         | 247     | 161   | -20 | -10 | -12 | -9  |
| 4.  | 2,4 DB 2     | 8.1         | 249     | 163   | -20 | -10 | -12 | -9  |
| 5.  | 2,4,5 T 1    | 7.7         | 253.1   | 195.1 | -50 | -10 | -16 | -13 |
| 6.  | 2,4,5 T 2    | 7.7         | 255     | 197   | -50 | -10 | -16 | -13 |
| 7.  | Bentazon 1   | 5.2         | 239     | 132   | -70 | -10 | -36 | -7  |
| 8.  | Bentazon 2   | 5.2         | 239     | 197   | -70 | -10 | -30 | -11 |
| 9.  | Bromoxynil 1 | 6.1         | 276     | 79    | -60 | -10 | -52 | -3  |
| 10. | Bromoxynil 2 | 6.1         | 276     | 81    | -60 | -10 | -52 | -3  |
| 11. | CAP 1        | 5.9         | 186.931 | 128.8 | -45 | -10 | -18 | -17 |

|     |                     |      |         |        |     |     |     |     |
|-----|---------------------|------|---------|--------|-----|-----|-----|-----|
| 12. | CAP 2               | 5.9  | 184.903 | 126.7  | -45 | -10 | -24 | -7  |
| 13. | Dicamba 1           | 5.4  | 219     | 175    | -25 | -10 | -10 | -9  |
| 14. | Dicamba 2           | 5.4  | 221     | 177    | -25 | -10 | -10 | -9  |
| 15. | Dichloprop 2,4 DP 1 | 7.5  | 233     | 161    | -40 | -10 | -18 | -11 |
| 16. | Dichloprop 2,4 DP 2 | 7.5  | 235     | 163    | -40 | -10 | -16 | -11 |
| 17. | Diflubenzuron 1     | 10.8 | 309     | 155.9  | -36 | -10 | -12 | -8  |
| 18. | Diflubenzuron 2     | 10.8 | 309     | 288.9  | -36 | -10 | -8  | -8  |
| 19. | Fipronil 1          | 4.6  | 435.00  | 330.00 | -18 | -10 | -20 | -6  |
| 20. | Fipronil 2          | 4.6  | 435.00  | 250.00 | -18 | -10 | -20 | -6  |
| 21. | Fluazifop 1         | 7.5  | 326.1   | 253.8  | -31 | -10 | -18 | -8  |
| 22. | Fluazifop 2         | 7.5  | 326.1   | 108.1  | -31 | -10 | -50 | -8  |
| 23. | Fluazinam 1         | 12.3 | 462.9   | 415.8  | -11 | -10 | -24 | -8  |
| 24. | Fluazinam 2         | 12.3 | 462.9   | 397.9  | -11 | -10 | -20 | -8  |
| 25. | Fludioxonil 1       | 9.4  | 247     | 125.9  | -56 | -10 | -42 | -8  |
| 26. | Fludioxonil 2       | 9.4  | 247     | 169    | -56 | -10 | -42 | -8  |
| 27. | Haloxifop 2         | 8.7  | 360     | 196    | -55 | -10 | -54 | -9  |
| 28. | Haloxifop 1         | 8.7  | 360     | 288    | -55 | -10 | -22 | -15 |
| 29. | Hexaflumuron 1      | 12.2 | 459     | 438.8  | -6  | -10 | -14 | -8  |
| 30. | Hexaflumuron 2      | 12.2 | 459     | 275.9  | -6  | -10 | -22 | -8  |
| 31. | Ioxynil 1           | 6.8  | 370     | 127    | -60 | -10 | -44 | -5  |
| 32. | Ioxynil 2           | 6.8  | 370     | 215    | -60 | -10 | -48 | -11 |
| 33. | MCPA 1              | 6.9  | 199     | 141    | -45 | -10 | -20 | -9  |
| 34. | MCPA 2              | 6.9  | 201     | 143    | -45 | -10 | -14 | -9  |
| 35. | MCPB 1              | 8.1  | 227     | 141    | -30 | -10 | -12 | -9  |
| 36. | MCPB 2              | 8.1  | 229     | 143    | -30 | -10 | -12 | -9  |
| 37. | MCPB Mecoprop 1     | 7.4  | 213     | 141    | -15 | -10 | -18 | -1  |
| 38. | MCPB Mecoprop 2     | 7.4  | 215     | 143    | -15 | -10 | -18 | -7  |
| 39. | Teflubenzuron 1     | 13.5 | 379     | 338.9  | -6  | -10 | -12 | -8  |
| 40. | Teflubenzuron 2     | 13.5 | 379     | 358.8  | -6  | -10 | -8  | -8  |
| 41. | Triflumuron 1       | 11.6 | 357     | 154    | -16 | -10 | -14 | -8  |
| 42. | Triflumuron 2       | 11.6 | 357     | 175.9  | -16 | -10 | -22 | -8  |
| 43. | Triclopyr 1         | 7.5  | 253.9   | 196    | -35 | -10 | -16 | -18 |
| 44. | Triclopyr 2         | 7.5  | 255.9   | 198    | -35 | -10 | -16 | -18 |

ID—compound (1—quantifier ion, 2—qualifier ion); RT—retention time; Q1—pseudo-molecular ion; Q3—fragment ion; DP—declustering potential; EP—entrance potential; CE—collision energy; CXP—collision cell exit potential.
